# Supplementary material for: Macrophage-Specific, Mafb-Deficient Mice Showed Delayed Skin Wound Healing
Source: MDPI journal article supplement (doi:10.3390/ijms23169346), 2022-08-19
Supplement: s1 [file s1]

A

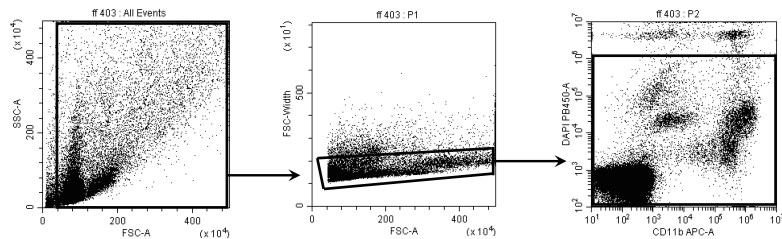

B

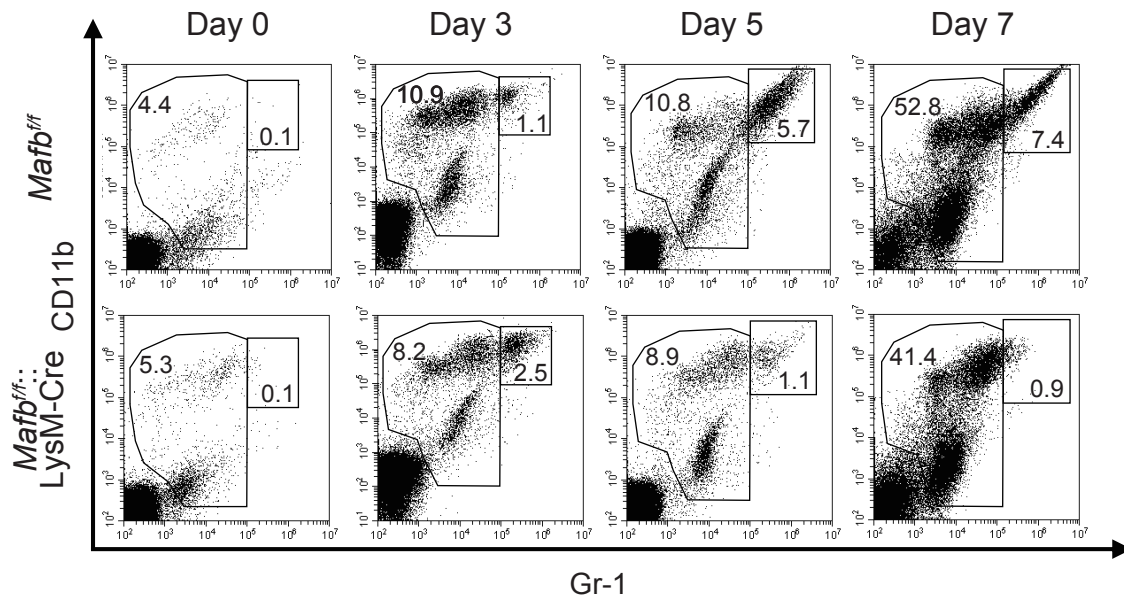

C

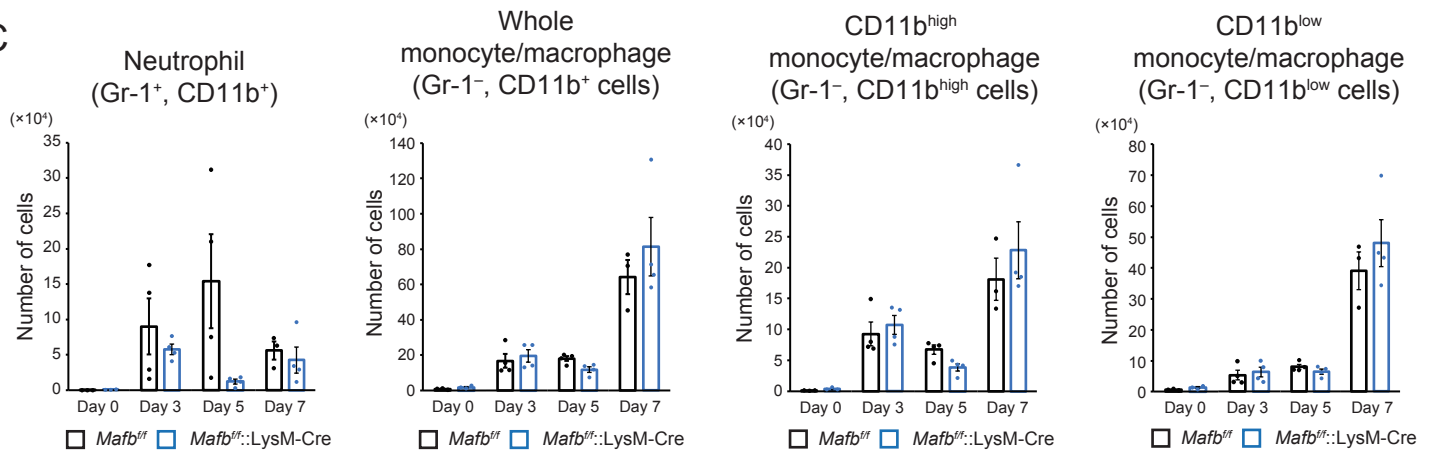

Supplemental Figure S1. The number of neutrophils and macrophages in wound

(A) Gating strategy of FACS analysis of wound tissue. (B) Cells in Day 0, 3, 5, and 7 wounds were stained with Gr-1 and CD11b antibodies and analyzed using flow cytometry. Dead cells were removed by DAPI staining shown as A. Representative dots plot was shown each day. (C) The absolute number of cells in each cell population shown in B was calculated from the overall number of cells taken from the tissue and the percentage of each cell population. Data are presented as the mean  $\pm$  S.E.M; \* $p < 0.05$ , Student's t-test. Each Day used  $n=3-4$  *Mafb<sup>ff/ff</sup>* and *Mafb<sup>ff/ff::LysM-Cre</sup>* mice and each dot represent the data from one mouse.

A

*Maif<sup>ff</sup>**Maif<sup>ff</sup>::LysM-Cre*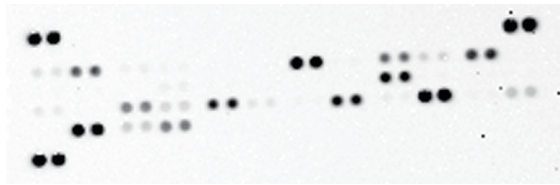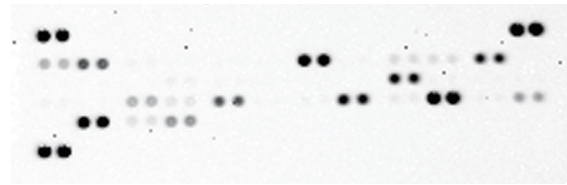

|   | 1                | 2           | 3 | 4 | 5            | 6 | 7            | 8 | 9                | 10 | 11              | 12 | 13             | 14 | 15                     | 16 | 17        | 18 | 19            | 20 | 21           | 22               |
|---|------------------|-------------|---|---|--------------|---|--------------|---|------------------|----|-----------------|----|----------------|----|------------------------|----|-----------|----|---------------|----|--------------|------------------|
| A | Positive Control |             |   |   | ADAMTS1      |   | Amphiregulin |   | Angiogenin       |    | Angiopoietin-1  |    | Angiopoietin-3 |    | Coagulation Factor III |    | CXCL16    |    |               |    |              | Positive Control |
| B |                  | IGFBP-10    |   |   | DLL4         |   | DPPIV        |   | EGF              |    | Endoglin        |    | Collagen XVIII |    | Endothelin-1           |    | FGF-1     |    | FGF-2         |    |              |                  |
| C |                  | KGF         |   |   | CX3CL1       |   | GM-CSF       |   | HB-EGF           |    | Hepatopoietin A |    | IGFBP-1        |    | IGFBP-2                |    | IGFBP-3   |    | IL-1 $\alpha$ |    | IL-1 $\beta$ |                  |
| D |                  | IL-10       |   |   | CXCL10/CRG-2 |   | CXCL1        |   | Leptin           |    | CCL2            |    | MMP-3          |    | MMP-8                  |    | MMP-9     |    | CCN3/IGFBP-9  |    |              |                  |
| E |                  | Osteopontin |   |   | PD-ECGF      |   | PDGF-AA      |   | PDGF-AB/-BB      |    | Pentraxin-3     |    | CXCL4          |    | PIGF-2                 |    | Prolactin |    | Proliferin    |    |              |                  |
| F | Positive Control | CXCL12      |   |   | Serpin E1    |   | PEDF         |   | Thrombospondin-2 |    | TIMP-1          |    | TIMP-4         |    | VEGF                   |    | VEGF-B    |    | Control (-)   |    |              |                  |

B

*Maifff**Maifff::LysM-Cre*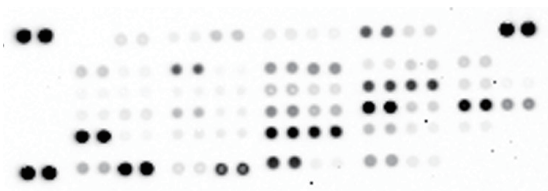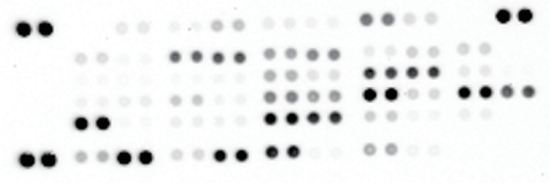

|   | 1       | 2      | 3 | 4 | 5            | 6 | 7      | 8 | 9    | 10 | 11    | 12 | 13      | 14 | 15            | 16 | 17            | 18 | 19           | 20 | 21     | 22 | 23     | 24          |
|---|---------|--------|---|---|--------------|---|--------|---|------|----|-------|----|---------|----|---------------|----|---------------|----|--------------|----|--------|----|--------|-------------|
| A | Control |        |   |   |              |   |        |   |      |    |       |    |         |    |               |    |               |    |              |    |        |    |        | Control     |
| B | CXCL13  | C5/C5a |   |   | G-CSF        |   | GM-CSF |   | CCL1 |    | CCL11 |    | sICAM-1 |    | IFN- $\gamma$ |    | IL-1 $\alpha$ |    | IL-1 $\beta$ |    | IL-1ra |    | IL-2   |             |
| C | IL-3    | IL-4   |   |   | IL-5         |   | IL-6   |   | IL-7 |    | IL-10 |    | IL-13   |    | IL-12 p70     |    | IL-16         |    | IL-17        |    | IL-23  |    | IL-27  |             |
| D | CXCL10  | CXCL11 |   |   | CXCL1        |   | M-CSF  |   | CCL2 |    | CCL12 |    | CXCL9   |    | CCL3          |    | CCL4          |    | CXCL2        |    | CCL5   |    | CXCL12 |             |
| E | CCL17   | TIMP-1 |   |   | TNF $\alpha$ |   | TREM-1 |   |      |    |       |    |         |    |               |    |               |    |              |    |        |    |        |             |
| F | Control |        |   |   |              |   |        |   |      |    |       |    |         |    |               |    |               |    |              |    |        |    |        | Control (-) |

## Supplemental Figure S2. Proteome analysis using Kits

(A) Inflammation and anti-inflammation cytokine array (*Maif<sup>ff</sup>*, n = 2; *Maif<sup>ff</sup>::LysM-Cre*, n = 2). (B) Angiogenesis-related protein array (*Maif<sup>ff</sup>*, n = 4; *Maif<sup>ff</sup>::LysM-Cre*, n = 4). The positions of the antibodies on each membrane are shown in a table. The vertical columns are shown in alphabetical order from A, starting from the top, and the horizontal rows are shown in numerical order from 1, starting from the left. Each protein was assessed in duplicate.

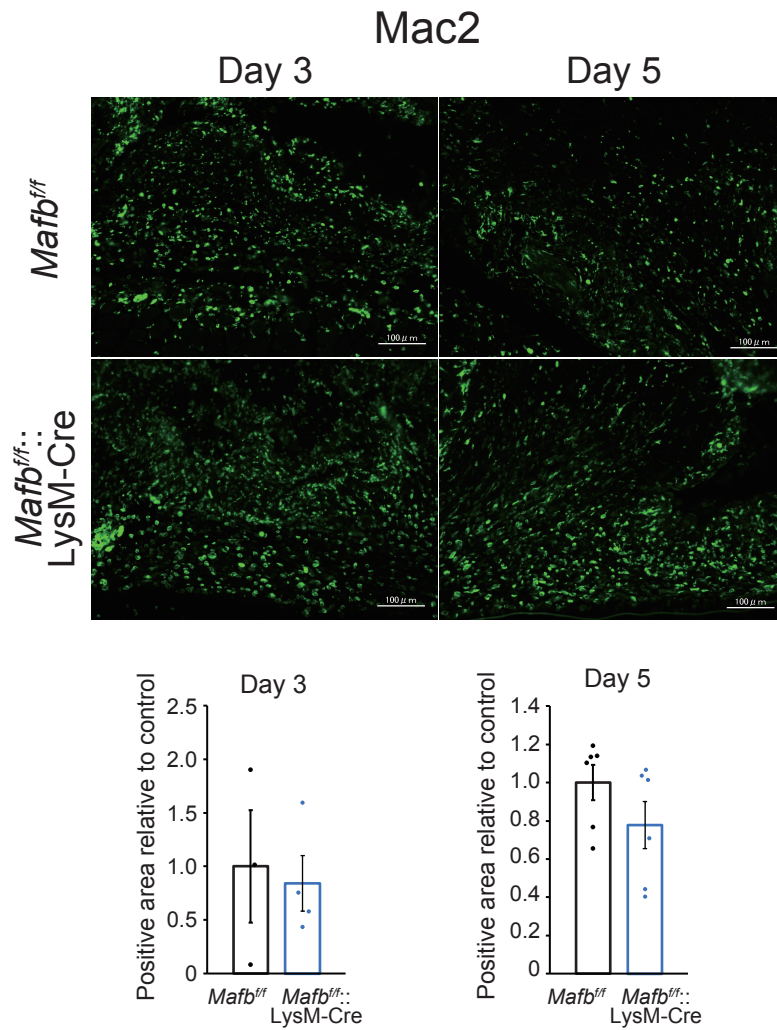

Supplemental Figure S3. Immunostaining of macrophages by Mac2

Immunostaining of Mac2 was performed in Day 3 and Day 5 wound tissue. The percentage of Mac2 positive area pre granulation tissue area was analyzed. Relative to control was shown in the graph.

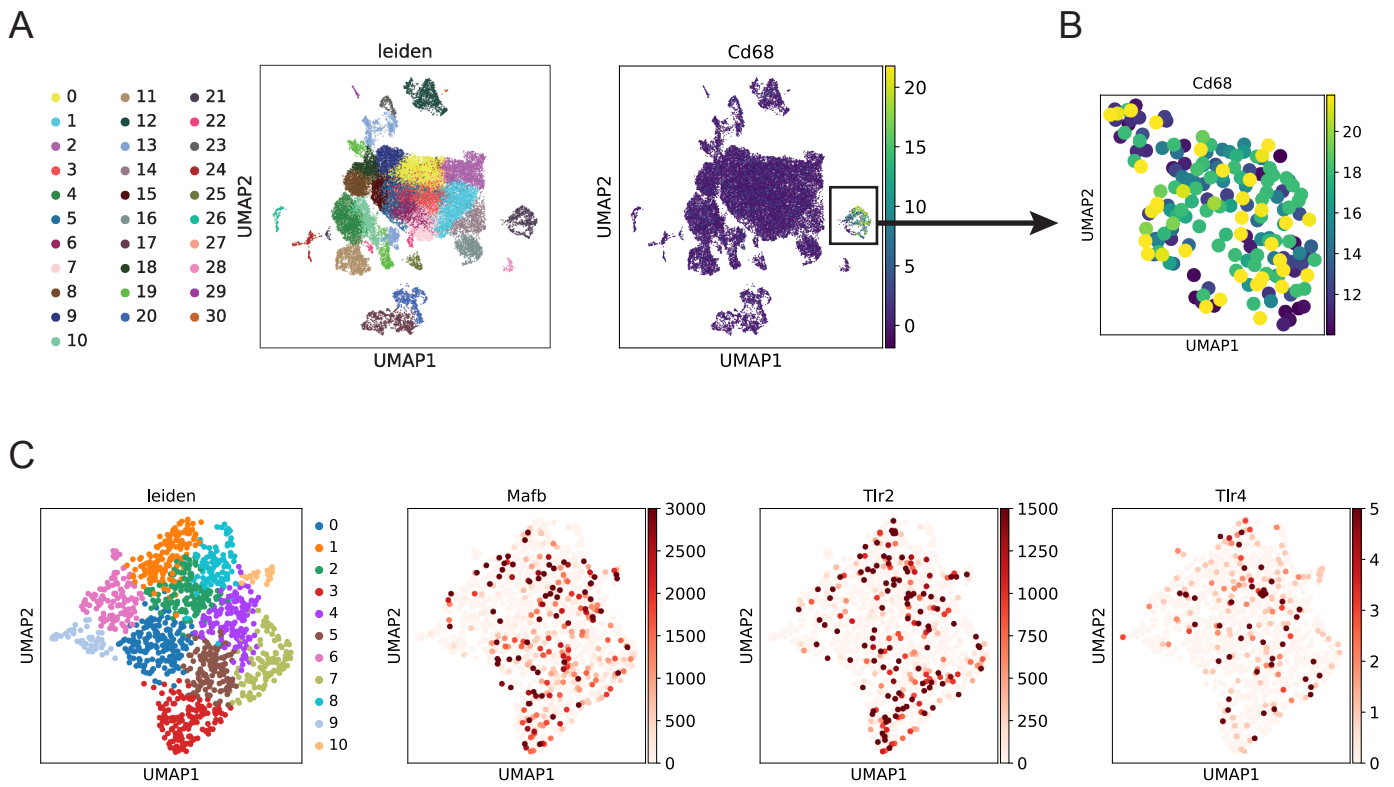

Supplemental Figure S4. The analysis of the scRNA-seq data

(A) Published scRNA-seq data of whole Day 5 wounds tissue were analyzed with Umap analysis. Cd68+ cells were shown. (B) The higher expression of Cd68 (the value over 10) were extracted. (C) Published scRNA-seq data of wound macrophages were analyzed with Umap analysis. The expression of *Mafb*, *Tlr2*, and *Tlr4* in wound macrophages were analyzed.



|        | Forward primer sequence (5'-3') | Reverse primer sequence (5'-3') |
|--------|---------------------------------|---------------------------------|
| Argl   | TGGCTTGCGAGACGTAGAC             | GCTCAGGTGAATCGGCCTTTT           |
| CCL2   | TGTTGGCTCAGCCAGATGCA            | AGCCTACTCATTGGGATCATCTTG        |
| CCL12  | ACCATCAGTCCTCAGGTATTGG          | TTCCGGACGTGAATCTTCTG            |
| CXCL10 | TGAATCCGGAATCTAAGACCATCAA       | AGGACTAGCCATCCACTGGGTAAAG       |
| EGF    | TCATCTGCTCTAATGCAGGTACA         | GTTTCCACAGTAACACTTCCCA          |
| HPRT   | CAAACCTTTGCTTTCCCTGGT           | CAAGGGCATATCCAACAACA            |
| IL-10  | CCAGGGAGATCCTTTGATGA            | CATTCCCAGAGGAATTGCAT            |
| IL-12b | GGAAGCACGGCAGCAGAATAA           | CTTGAGGGAGAAGTAGGAATG           |
| iNOS   | ATGGCTTGCCCTGGAAGTTTC           | CAAGACTTGGACTTGCAAGTG           |
| PRL    | CTCAGGCCATCTTGGAGAAG            | GAAGTGGGGCAGTCATTGAT            |

Table S1. Primer sequences used for RT-qPCR
